# Supplementary material for: Wearable solid-state capacitors based on two-dimensional material all-textile heterostructures
Source: Royal Society of Chemistry journal article supplement (doi:10.1039/c9nr00463g), 2019-01-01
Supplement: c9nr00463g1.pdf [file c9nr00463g1.pdf]

## Supporting information

### A two-dimensional material all-textile capacitor

*Siyu Qiang,<sup>†,‡</sup> Tian Carey,<sup>‡</sup> Adrees Arbab,<sup>‡</sup> Weihua Song,<sup>†</sup> Chaoxia Wang,<sup>†</sup> Felice*

*Torrizi<sup>‡</sup>*

<sup>†</sup> Key Laboratory of Eco-Textile, Ministry of Education, School of Textiles and  
Clothing, Jiangnan University, 1800 Lihu Road, Wuxi 214122, China

<sup>‡</sup> Cambridge Graphene Centre, Department of Engineering, University of Cambridge,  
9 JJ Thomson Avenue, Cambridge CB3 0FA, UK

#### Estimation of contact ratio (CR)

We estimated the contact areas ( $A_1, A_2, A_3, A_4$ ) as compared to the total area ( $A_0$ ) for every repeated unit as follows.

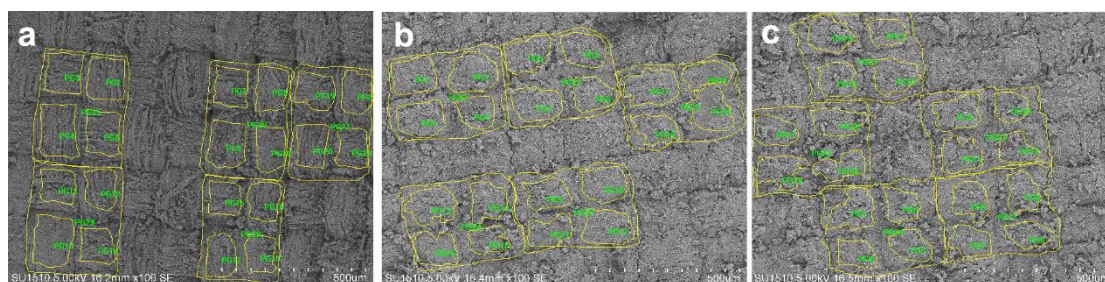

**Figure 1S.** The top-view SEM images of GNP/polyester ( $m_{GNP} \sim 0.69 \text{ mg cm}^{-2}$ ) where the yellow profiles sketch the contours of  $A_0, A_1, A_2, A_3, A_4$  of each repeated units.

Applying the above method to the five repeated units in Figure 1S, we obtained the following Table 1S, where the  $A_0$  correspond to large yellow profiles in Figure 1S, and the  $A_1, A_2, A_3, A_4$  correspond to 4 small yellow profiles inside repeated units. The averaged  $CR$  is obtained  $\sim 0.5$ .

**Table 1S.** The corresponding areas of  $A_0, A_1, A_2, A_3, A_4$  of 15 repeated units.

| Units | $A_0$  | $A_1$ | $A_2$ | $A_3$ | $A_4$ | $CR$ |
|-------|--------|-------|-------|-------|-------|------|
| 1     | 122207 | 18148 | 16864 | 22354 | 17098 | 0.61 |
| 2     | 115978 | 14895 | 15540 | 19160 | 14820 | 0.56 |
| 3     | 110103 | 13152 | 13688 | 21857 | 13144 | 0.56 |
| 4     | 99954  | 12092 | 13495 | 13989 | 12580 | 0.52 |
| 5     | 122008 | 15158 | 14872 | 14229 | 13566 | 0.47 |
| 6     | 119889 | 17167 | 17738 | 19637 | 12609 | 0.56 |
| 7     | 116389 | 16516 | 15853 | 17262 | 14339 | 0.55 |
| 8     | 115432 | 13615 | 16561 | 13312 | 18407 | 0.54 |
| 9     | 114316 | 17645 | 14566 | 15091 | 10755 | 0.51 |
| 10    | 113864 | 19884 | 12664 | 18419 | 12534 | 0.56 |
| 11    | 123926 | 16615 | 11381 | 12392 | 10929 | 0.41 |
| 12    | 125079 | 13749 | 12903 | 12549 | 11381 | 0.40 |
| 13    | 118848 | 16113 | 10572 | 14219 | 11335 | 0.44 |
| 14    | 124349 | 10574 | 15247 | 13437 | 15821 | 0.44 |
| 15    | 121584 | 13615 | 14642 | 15298 | 12707 | 0.46 |
